# Supplementary material for: Multifunctional hybrid sponge for in situ postoperative management to inhibit tumor recurrence
Source: Royal Society of Chemistry journal article supplement (doi:10.1039/d1bm00085c), 2021-01-01
Supplement: d1bm00085c1.pdf [file d1bm00085c1.pdf]

## Supporting Information

### **Multifunctional hybrid sponge for in situ postoperative management to inhibit tumor recurrence**

Haixia Wang,<sup>†a</sup> Yuanyuan Jin,<sup>†a</sup> Yanyan Chen,<sup>a</sup> Yun Luo,<sup>b</sup> Shixian Lv,<sup>c</sup> Mingqiang Li<sup>\*a</sup> and Yu Tao<sup>\*a,d</sup>

<sup>a</sup> Laboratory of Biomaterials and Translational Medicine, Center for Nanomedicine, The Third Affiliated Hospital, Sun Yat-sen University, Guangzhou 510630, China.

E-mail: limq567@mail.sysu.edu.cn, taoy28@mail.sysu.edu.cn

<sup>b</sup> Department of Urology, The Third Affiliated Hospital, Sun Yat-sen University, Guangzhou 510630, China.

<sup>c</sup> Department of Bioengineering, University of Washington, Seattle, WA 98195, United States.

<sup>d</sup> Guangdong Provincial Key Laboratory of Liver Disease, Guangzhou 510630, China.

<sup>†</sup> These authors contributed equally to this work.

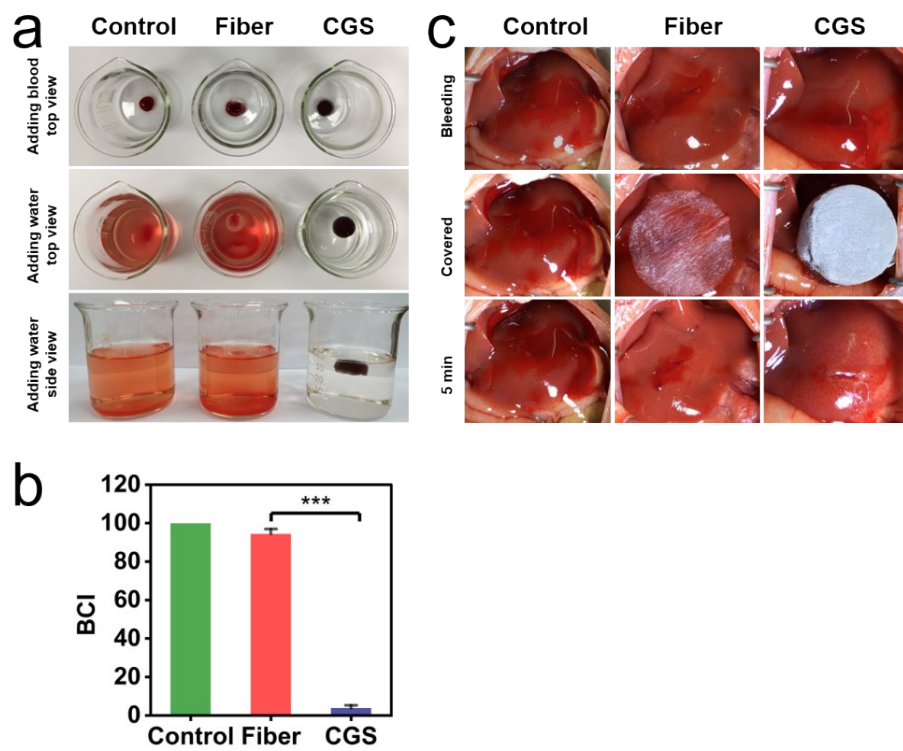

**Fig. S1** Investigation of the hemostatic capability of electrospun fiber. a-b) Photographs showing the blood clotting process of fiber and sponge *in vitro* and the corresponding calculated BCI values. \*\*\* $p < 0.001$ . c) Photographs of liver bleeding and hemostatic process.

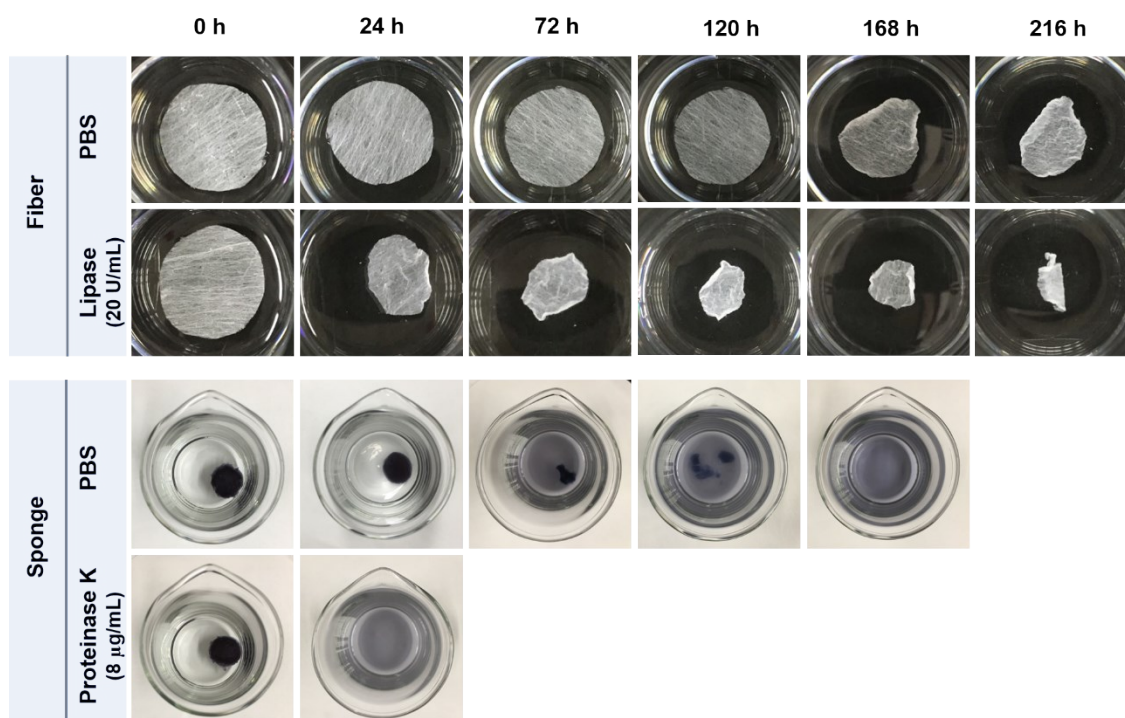

**Fig. S2** Photographs of electrospun fiber and sponge incubated in PBS in the presence or absence of enzymes at 37 °C over time, which represent the degradation of electrospun fiber and sponge.

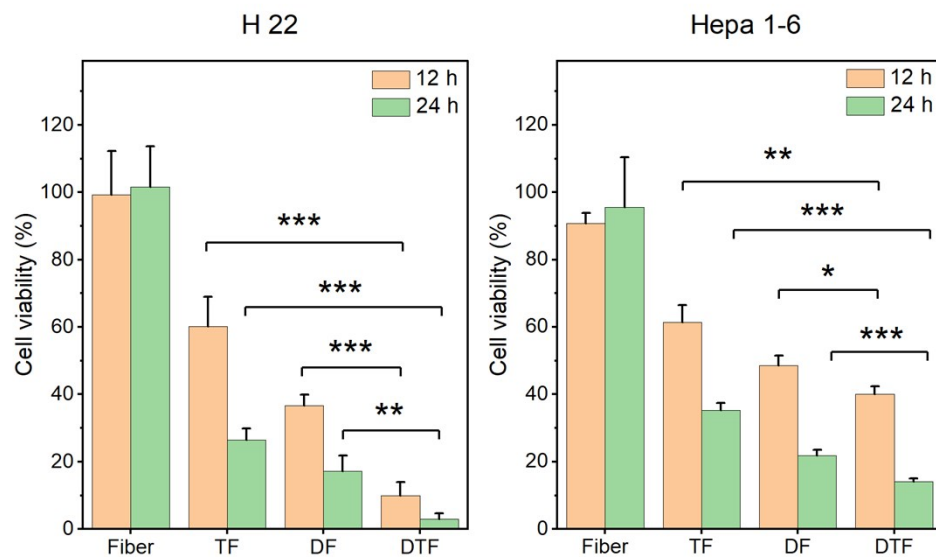

**Fig. S3** Evaluation of the cytotoxicity of the drug loaded fibers, including fiber, triptolide loaded fiber (TF), DOX loaded fiber (DF), and DOX-triptolide co-loaded fiber (DTF). \* $p < 0.05$ , \*\* $p < 0.01$ . \*\*\* $p < 0.001$ .

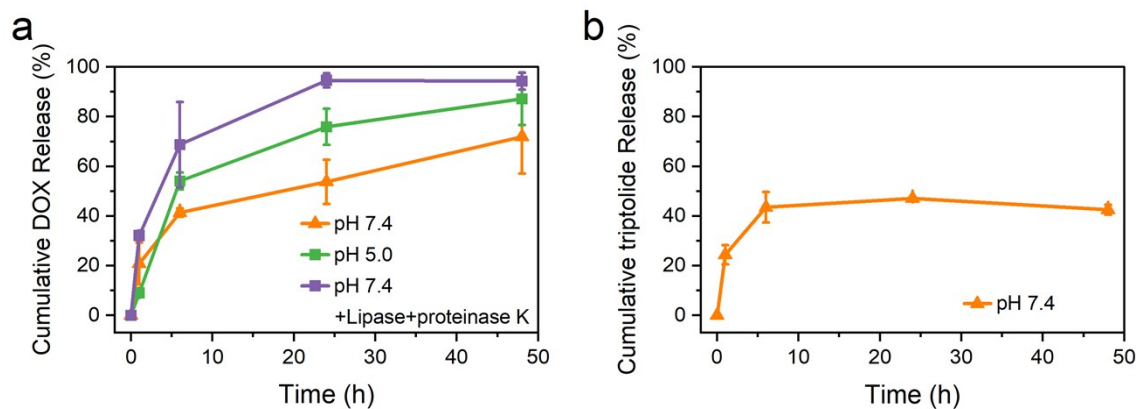

**Fig. S4** Release profiles of DOX (a) and triptolide (b) from DTF/CGS in PBS.
